# Supplementary material for: Preimmune Control of the Variance of TCR CDR-B3: Insights Gained From Germline Replacement of a TCR Dβ Gene Segment With an Ig DH Gene Segment
Source: Front Immunol. 2020 Sep 11;11:2079. doi: 10.3389/fimmu.2020.02079 (PMC7518465; doi:10.3389/fimmu.2020.02079)
Supplement: TABLE S1 — TCR CDR-B3 sequences. [file Table_1.XLSX]

## Sheet: CDR-B3 YTL Db2ko WT
Genotype	ID	VB	D-IMGT	D	RF	Vbeta	VP	V/D	No D	N	5'DP	DB	3'DP	D/J	N'	JP	JB	JB
DbYTL	DN2-1	13.1	D2-02*01	YTL	2	GCCAGCAGTGA				GGGG		ATGGTTACGAC			AA		CCAACGAAAGATTATTT	J1-4
DbYTL	DN2-10	13.1	D2-02*01	YTL	3	GCCAG				GCCAG		TATGG			CA		AAACACAGAAGTCTTC	J1-1
DbYTL	DN2-11	13.1	D2-02*01	YTL	2	GCCAGCAGT						ACGA			AG		AACACAGAAGTCTTC	J1-1
DbYTL	DN2-12	13.1	D2-02*01	YTL	2	GCCAGCAG				GG	GA	TCTACTATGGTT			C		TTTCCAACGAAAGATTATTT	J1-4
DbYTL	DN2-13	13.1	D2-02*01	YTL	1	GCCAGCAGTGATG						ATGGT			C		ACACAGAAGTCTTC	J1-1
DbYTL	DN2-14	13.1	D2-02*01	YTL	2	GCCAGCAGTGA				ACTCC		TTACGAC	G		GGA		GGAAATACGCTCTAT	J1-3
DbYTL	DN2-15	13.1	D2-02*01	YTL	2	GCC				GGC	AGA	TCTACTATGGTT			GGTCACCG		GGCTCCGCTT	J1-5
DbYTL	DN2-16	13.1		NoD		GCCAGCAG			AGGAACAGC								TTTCAACGAAAGATTATTT	J1-4
DbYTL	DN2-17	13.1	D2-02*01	YTL	2	GCCAGCAGTGA				CGG		GGTTACG			GGG		AACACAGAAGTCTTC	J1-1
DbYTL	DN2-18	13.1	D2-02*01	YTL	2	GCCAGCAGTGATG				A		GGT			G		AACAACCAGGCTCCGCTT	J1-5
DbYTL	DN2-19	13.1	D2-02*01	YTL	2	GCCAGCAGTGAT						ATGGTTACGAC	GTCG		G		ACACAGAAGTCTTC	J1-1
DbYTL	DN2-2	13.1	D2-02*01	YTL	1	GCCAGCA				GCATCTCT		TATGGTTAC					AACTCCGACTACACC	J1-2
DbYTL	DN2-20	13.1	D2-02*01	YTL	1	GCCAGCAGTG		A				CGAC	G		GG	G	CAAACTCCGACTACACC	J1-2
DbYTL	DN2-21	13.1	D2-02*01	YTL	1	GCCAGCAGTG		A				CTATGGTTACGAC	G		GGG	A	TTCTGGAAATACGCTCTAT	J1-3
DbYTL	DN2-22	13.1	D2-02*01	YTL	1	GCCAGCAGTGA					GA	TCTACTATGGT			CT		TAACAACCAGGCTCCGCTT	J1-5
DbYTL	DN2-23	13.1	D2-02*01	YTL	3	GCCAGCAGTG				G		TCTACTATGGTTACG			GAT		AAACTCCGACTACACC	J1-2
DbYTL	DN2-24	13.1	D2-02*01	YTL	2	GCCAGCAGTGAT				AGCG		CTACTATGGTTACGAC			CG		CAGAAGTCTTC	J1-1
DbYTL	DN2-25	13.1	D2-02*01	YTL	1	GCCAGCAG				CCC		CTATGGTTA			TT		TTTCCAACGAAAGATTATTT	J1-4
DbYTL	DN2-26	13.1	D2-02*01	YTL	3	GCCAGCAGTGAT						TGGTTA			TC		TTCCAACGAAAGATTATTT	J1-4
DbYTL	DN2-27	13.1	D2-02*01	YTL	1	GCCAGCAG				CG		TCTACTATGGTTA					TGGAAATACGCTCTAT	J1-3
DbYTL	DN2-28	13.1	D2-02*01	YTL	3	GCCAGCAGTGAT						TGGTTAC			AAA		CCAGCGAAAGATTATTT	J1-4
DbYTL	DN2-29	13.1	D2-02*01	YTL	1	GCCAGCAGTG				GGGGCTTA		TATGGTTACGA			TGG		CACAGAAGTCTTC	J1-1
DbYTL	DN2-3	13.1	D2-02*01	YTL	1	GCCAGCAG		T				TACGAC	G		G		CACAGAAGTCTTC	J1-1
DbYTL	DN2-30	13.1	D2-02*01	YTL	1	GCCAGCAGTG				GGGGGGGT		TATGGTTACG			TAAT		TTCTGGAAATACGCTCTAT	J1-3
DbYTL	DN2-31	13.1	D2-02*01	YTL	1	GCCAGCAGTGATG						GTTACGAC	G		CTCG		CGAAAGATTATTT	J1-4
DbYTL	DN2-32	13.1	D2-02*01	YTL	2	GCCAGCAGTGATG				GGGG		GGTTACGAC	G		G		ACTCCGACTACACC	J1-2
DbYTL	DN2-33	13.1	D2-02*01	YTL	2	GCCAGCAG				CCCCA		CTATGGTTACGAC	G		GG		CGAAAGATTATTT	J1-4
DbYTL	DN2-34	13.1	D2-02*01	YTL	3	GCCAG						ATGGTTA			GG	AA	TTTCCAACGAAAGATTATTT	J1-4
DbYTL	DN2-35	13.1	D2-02*01	YTL	1	GCCAG				GCCA		GGTTACGAC	G		A		AAACACAGAAGTCTTC	J1-1
DbYTL	DN2-36	13.1	D2-02*01	YTL	1	GCCAGCAGT				TT		CTATGGTTACGAC	GT				CACAGAAGTCTTC	J1-1
DbYTL	DN2-37	13.1	D2-02*01	YTL	3	GCCAGCAGTGAT						TGGTTAC			AAA		CCAACGAAAGATTATTT	J1-4
DbYTL	DN2-38	13.1	D2-02*01	YTL	1	GCCAGCAGTG				CT		TATGGTTAC			C		CCAACGAAAGATTATTT	J1-4
DbYTL	DN2-39	13.1	D2-02*01	YTL	3	GCCAGCAG				CCCA		CTACTATGGTTACGAC	GT		GGGG		CAGAAGTCTTC	J1-1
DbYTL	DN2-4	13.1		NoD		GCCAGCAG			AGGAACAGC								TTCCAACGAAAGATTATTT	J1-4
DbYTL	DN2-40	13.1	D2-02*01	YTL	2	GCCAGCAGTG				T		TATGGTTACGAC	G		ATG		TCCAACGAAAGATTATTT	J1-4
DbYTL	DN2-41	13.1	D2-02*01	YTL	2	GCCAGCA				CC	AGA	TCTACTATGGTTACG			GCCG		CCAACGAAAGATTATTT	J1-4
DbYTL	DN2-42	13.1	D2-02*01	YTL	3	GCCAGCAGTGATG				TGG		GGTTACG			GCT	AA	TTTCCAACGAAAGATTATTT	J1-4
DbYTL	DN2-43	13.1	D2-02*01	YTL	1	GCCAGCAGTGATG						GTTAC				AA	TTCTGGAAATACGCTCTAT	J1-3
DbYTL	DN2-44	13.1	D2-02*01	YTL	1	GCCAGCAGTGATG	C			G		GGTTAC			T		CAAACTCCGACTACACC	J1-2
DbYTL	DN2-45	13.1	D2-02*01	YTL	2	GCCAGCAGTGATG		C		TCCC		ATGGTTACG			GACGG		CACAGAAGTCTTC	J1-1
DbYTL	DN2-46	13.1	D2-02*01	YTL	2	GCCAGCAG				CCA		GGTTAC			CC	A	TAACAACCgGGCTCCGCTT	J1-5
DbYTL	DN2-47	13.1		NoD		GCCAGCAGTG			GTCCCTG								CGAAAGATTATTT	J1-4
DbYTL	DN2-48	13.1	D2-02*01	YTL	1	GCCAGCAGTGAT						TATGGTTACGAC	GT				CTCCGACTACACC	J1-2
DbYTL	DN2-49	13.1	D2-02*01	YTL	2	GCCAGCAGTGA				C		ATGGTT			C		CCTATAATTCGCCCCTCTAC	J1-6
DbYTL	DN2-5	13.1	D2-02*01	YTL	2	GCCAGCAGTGATG	CA					ACT			CCA		AACGAAAGATTATTT	J1-4
DbYTL	DN2-50	13.1	D2-02*01	YTL	1	GCCAGCAGT				CGGG		ATGGTTACG			GGGGCCGG		GAAAGATTATTT	J1-4
DbYTL	DN2-6	13.1	D2-02*01	YTL	2	GCCAGCAGT				C		CTACTATGGTTAC			TG		CCAACGAAAGATTATTT	J1-4
DbYTL	DN2-7	13.1	D2-02*01	YTL	3	GCCAGCAG				ACA		ACTATGGTTA			GAGGC		CACAGAAGTCTTC	J1-1
DbYTL	DN2-8	13.1	D2-02*01	YTL	3	GCCAGCAGTGA				GGA		ACTATGGTTACG			G		AACTCCGACTACACC	J1-2
DbYTL	DN2-9	13.1	D2-02*01	YTL	1	GCCAGCAGTGAT				A		ATGGTTACG		AC			ACAGAAGTCTTC	J1-1
Db2KO	DN2-1	13.1	TRBD1'01	1	3	GCCAGCAGTGAT				C		GGC			AG		AACTCCGACTACACC	J1-2
Db2KO	DN2-10	13.1	TRBD1'01	1	1	GCCAGCAG				C	CCC	GGGACAGG			TCC		CGAAAGATTATTT	J1-4
Db2KO	DN2-11	13.1	TRBD1'01	1	3	GCCAGCAGTGATG	CA					AGGG			CA	AA	TTCTGGAAATACGCTCTAT	J1-3
Db2KO	DN2-12	13.1	TRBD1'01	1	3	GCCAGCAGTGAT						AGGG			C	AA	TTTCCAACGAAAGATTATTT	J1-4
Db2KO	DN2-13	13.1	TRBD1'01	1	2	GCCAGCAGTGAT				CCGTG		GGGAC				A	TAACAACCAGGCTCCGCTT	J1-5
Db2KO	DN2-14	13.1		NoD		GCCAGCAGTG			GTCAAA								ATAATTCGCCCCTCTAC	J1-6
Db2KO	DN2-15	13.1	TRBD1'01	1	3	GCCAGCAGT		G				ACAGGGG					TTCTGGAAATACGCTCTAT	J1-3
Db2KO	DN2-16	13.1	TRBD1'01	1	3	GCCAGCAGTGATG	CA			G		GGGGGC	GC		AG		CAACGAAAGATTATTT	J1-4
Db2KO	DN2-17	13.1	TRBD1'01	1	3	GCCAGCAGTGATG				G		CAGGGG			CG		ACTCCGACTACACC	J1-2
Db2KO	DN2-18	13.1	TRBD1'01	1	1	GCCAGCAGTG				TCCTCC		CAGGGGG			A		AATTCGCCCCTCTAC	J1-6
Db2KO	DN2-19	13.1	TRBD1'01	1	2	GCCAGCAGTGATG					C	GGGACAGGGG			ACCC		CAGAAGTCTTC	J1-1
Db2KO	DN2-2	13.1		NoD		GCCAGCAGTGATG			GCCC								TTCCTATAATTCGCCCCTCTAC	J1-6
Db2KO	DN2-20	13.1	TRBD1'01	1	3	GCCAGCA				AGGAGAGGG		GGGAC			GGGG		ACTCCGACTACACC	J1-2
Db2KO	DN2-21	13.1	TRBD1'01	1	1	GCCAGCAGTGAT				AA		AGGGG					CCTATAATTCGCCCCTCTAC	J1-6
Db2KO	DN2-22	13.1	TRBD1'01	1	1	GCCAGCAGTG				AGC		CAG					CAAACTCCtACTACACC	J1-2
Db2KO	DN2-23	13.1	TRBD1'01	1	2	GCCAGCAGTG				AGAGC		GGACA			C		TCCAACGAAAGATTATTT	J1-4
Db2KO	DN2-24	13.1	TRBD1'01	1	3	GCCAGCAGT		G				ACAG					CTCCGACTACACC	J1-2
Db2KO	DN2-25	13.1		NoD		GCCAGCAGTGATG	C		CCCCC								CCGACTACACC	J1-2
Db2KO	DN2-26	13.1	TRBD1'01	1	2	GCCAGCAG				A	CC	GGGACAG					AACAACCAGGCTCCGCTT	J1-5
Db2KO	DN2-27	13.1	TRBD1'01	1	2	GCCAGCAGTGAT				AA		GGGACA			AG		ACAACCAGGCTCCGCTT	J1-5
Db2KO	DN2-28	13.1	TRBD1'01	1	3	GCCAGCAGTG				AGG		GGGGG			ATAA		CCGACTACACC	J1-2
Db2KO	DN2-29	13.1	TRBD1'01	1	3	GCCAGCAGTGAT				TCACG		CAG			A	TA	TAACAACCAGGCTCCGCTT	J1-5
Db2KO	DN2-3	13.1	TRBD1'01	1	3	GCCAGCAGTG				CAGG		CAGGG			AGGG		CGAAAGATTATTT	J1-4
Db2KO	DN2-30	13.1	TRBD1'01	1	1	GCCAGCAGTGATG	C			CC		GGACAG				TTG	CAAACTCCGACTACACC	J1-2
Db2KO	DN2-31	13.1	TRBD1'01	1	1	GCCAGCAGT				TC		GACAGGGGG			AAA		ATTATTT	J1-4
Db2KO	DN2-32	13.1	TRBD1'01	1	2	GCCAGCAGT		G				GACAG				A	TTTCCAACGAAAGATTATTT	J1-4
Db2KO	DN2-33	13.1	TRBD1'01	1	1	GCCAGCAGTG				A		AGG					CTATAATTCGCCCCTCTAC	J1-6
Db2KO	DN2-34	13.1	TRBD1'01	1	2	GCCAGCAGTG				CC		GGA					TCCTATAATTCGCCCCTCTAC	J1-6
Db2KO	DN2-35	13.1	TRBD1'01	1	1	GCCAGCA				CCAA		GACAG				A	TTCTGGAAATACGCTCTAT	J1-3
Db2KO	DN2-36	13.1	TRBD1'01	1	1	GCCAGCAGTG				AAT	CC	GGGAC				AA	TTTCCAACGAAAGATTATTT	J1-4
Db2KO	DN2-37	13.1	TRBD1'01	1	1	GCCAGCAGT				TCCT	CC	GGGA			G		AAACTCCGACTACACC	J1-2
Db2KO	DN2-38	13.1	TRBD1'01	1	1	GCCAGCAGTGATG						CAGG			CAGCT		CAAACTCCGACTACACC	J1-2
Db2KO	DN2-39	13.1	TRBD1'01	1	2	GCCAGCAGTGA				AA	C	GGGAC			GAA	AAA	TTTCCAACGAAAGATTATTT	J1-4
Db2KO	DN2-4	13.1	TRBD1'01	1	2	GCCAGCAGTG				CC		GGGGC			CT		ACACAGAAGTCTTC	J1-1
Db2KO	DN2-40	13.1	TRBD1'01	1	1	GCCAGCAGTGAT				TT		GGGA			GGG		AACTCCGACTACACC	J1-2
Db2KO	DN2-41	13.1	TRBD1'01	1	1	GCCAGCAGT		G				GGACAG			AGGG		CACAGAAGTCTTC	J1-1
Db2KO	DN2-42	13.1	TRBD1'01	1	3	GCCAGCAGTGATG				AG		AGGGGGC	G		GTGGA		CCAACGAAAGATTATTT	J1-4
Db2KO	DN2-43	13.1	TRBD1'01	1	2	GCCAGCAGT					CC	GGGACAG			C		ACAACCAGGCTCCGCTT	J1-5
Db2KO	DN2-44	13.1	TRBD1'01	1	2	GCCAGCAGTG					C	GGGAC			GGCC		CGAAAGATTATTT	J1-4
Db2KO	DN2-45	13.1	TRBD1'01	1	2	GCCAGCAGTGATG				A		GGC			AGT		CAACCAGGCTCCGCTT	J1-5
Db2KO	DN2-46	13.1	TRBD1'01	1	1	GCCAGCAGTG				AGA		GGACAGGGGG			GCTCGG		CACAGAAGTCTTC	J1-1
Db2KO	DN2-47	13.1		NoD		GCCAGCAGTGATG	C		TA								CAAACACAGAAGTCTTC	J1-1
Db2KO	DN2-48	13.1	TRBD1'01	1	2	GCCAGCAGTG				ACGGGAA		ACAGGG			A		AACGAAAGATTATTT	J1-4
Db2KO	DN2-49	13.1	TRBD1'01	1	1	GCCAGCAGTG				AG		GGGACAGGGG					ACACAGAAGTCTTC	J1-1
Db2KO	DN2-5	13.1	TRBD1'01	1	2	GCCAGCAGTGAT				C		GACAG			CA		TTCCAACGAAAGATTATTT	J1-4
Db2KO	DN2-50	13.1	TRBD1'01	1	1	GCCAGCAGT				T		GGACAG			AGGG		CGAAAGATTATTT	J1-4
Db2KO	DN2-51	13.1	TRBD1'01	1	2	GCCAGCAGT				CCC		GGACA					AAACTCCGACTACACC	J1-2
Db2KO	DN2-6	13.1	TRBD1'01	1	3	GCCAG				GCCAG		GGGACAGGG					ACACAGAAGTCTTC	J1-1
Db2KO	DN2-7	13.1	TRBD1'01	1	1	GCCAGCAGTGAT				C		GGACAG					CAAACTCCGACTACACC	J1-2
Db2KO	DN2-8	13.1	TRBD1'01	1	2	GCCAGCAGTG				C	CCC	GGGACAG			AAC		ACAGAAGTCTTC	J1-1
Db2KO	DN2-9	13.1	TRBD1'01	1	2	GCCAGCAGTG						AGG			TCGAAA		CAAACTCCGACTACACC	J1-2
WT	DN2-1	13.1	TRBD1'01	1	2	GCCAGCAGTG				CT	CC	GGGACAGGGG					AACACAGAAGTCTTC	J1-1
WT	DN2-10	13.1	TRBD1'01	1	3	GCCAGCAG				AGT	CC	GGGACA			AAA		AAAACACCTTGTAC	J2-4
WT	DN2-11	13.1		NoD		GCCAGCAGTGATG			T								AAATACGCTCTAT	J1-3
WT	DN2-12	13.1	TRBD1'01	1	2	GCCAGCAGTGATG						AGGGG			T		TTTCCAACGAAAGATTATTT	J1-4
WT	DN2-13	13.1		NoD		GCCAGCAGTGATG			AA								TCCTATGAACAGTAC	J2-7
WT	DN2-14	13.1		NoD		GCCAGCAGTGATG			AC							AGGAG	CTCCTATGAACAGTAC	J2-7
WT	DN2-15	13.1	TRBD1'01	1	1	GCCAGCA				C		GACAGGGGGC					AACCAAGACACCCAGTAC	J2-5
WT	DN2-17	13.1	TRBD1'01	1	1	GCCAGCAGTGATG	CA			GA		GACAGGG			A		CCAACGAAAGATTATTT	J1-4
WT	DN2-18	13.1	TRBD1'01	1	1	GCCAGCA				A		GAC				AA	TTTCCAACGAAAGATTATTT	J1-4
WT	DN2-19	13.1	TRBD2'01	2	1	GCCAGCAGTGATG						CTGGGGG			CT	CT	AGTGCAGAAACGCTGTAT	J2-3
WT	DN2-2	13.1	TRBD1'01	1	1	GCCAGCA				AGA		GGACAGGGGG					AAACACAGAAGTCTTC	J1-1
WT	DN2-20	13.1	TRBD1'01	1	1	GCCAGCAGTGATG	CAT					GGACAGGGG					ACGAAAGATTATTT	J1-4
WT	DN2-21	13.1	TRBD1'01	1	2	GCCAGCAGTGAT				CCT	CC	GGGACAGGGGGC			AA		AAACGCTGTAT	J2-3
WT	DN2-22	13.1	TRBD1'01	1	1	GCCAGCAGTGAT						ACAGGG					AACTCCGACTACACC	J1-2
WT	DN2-23	13.1	TRBD1'01	1	1	GCCAGCAGT		G				GGA			G		CAACGAAAGATTATTT	J1-4
WT	DN2-24	13.1	TRBD1'01	1	1	GCCAGCAGTGATG				A		AGGG			TTAG		CCAACGAAAGATTATTT	J1-4
WT	DN2-25	13.1	TRBD1'01	1	2	GCCAGCA				CT		GGAC			GGT		TTTCCAACGAAAGATTATTT	J1-4
WT	DN2-26	13.1	TRBD1'01	1	2	GCCAGCAGTG				G		GGGACAGGG			C		GAAGTCTTC	J1-1
WT	DN2-27	13.1	TRBD1'01	1	2	GCCAGCAGT					CC	GGGACA					AAACTCCGACTACACC	J1-2
WT	DN2-28	13.1	TRBD1'01	1	1	GCCAGCAGT				C		CAG			T		CTATGCTGAGCAGTTC	J2-1
WT	DN2-29	13.1	TRBD1'01	1	2	GCCAGCAGTG				GG	CC	GGGACA			A	AA	TTCTGGAAATACGCTCTAT	J1-3
WT	DN2-3	13.1	TRBD1'01	1	1	GCCAGCAGTGATG	C			T		ACAGGGG			AT		AACTCCGACTACACC	J1-2
WT	DN2-30	13.1	TRBD1'01	1	3	GCCAG		CAG				GGGG				ACT	AGTGCAGAAACGCTGTAT	J2-3
WT	DN2-31	13.1	TRBD1'01	1	2	GCCAGCAGTGAT				CT		GGGACAGGGG			T		ACCAGGCTCCGCTT	J1-5
WT	DN2-32	13.1	TRBD1'01	1	2	GCCAGCAGTGATG	C			G		CAG			A		CAGAAACGCTGTAT	J2-3
WT	DN2-33	13.1	TRBD1'01	1	1	GCCAGCA				CA		ACAGGGGGC	GC				TGAACAGTAC	J2-7
WT	DN2-34	13.1	TRBD1'01	1	1	GCCAGCAGTG					CC	GGGACAGGG			T		CAAACACAGAAGTCTTC	J1-1
WT	DN2-35	13.1	TRBD1'01	1	3	GCCAGCAGTG				ACCC		GGACAGGG			C		CAACCAGGCTCCGCTT	J1-5
WT	DN2-36	13.1	TRBD2'01	2	1	GCCAGCAGTG				GCGGGG	CC	GGGACTGGG					TATGAACAGTAC	J2-7
WT	DN2-37	13.1	TRBD1'01	1	3	GCCAGCAG				A		GACAG					TAATTCGCCCCTCTAC	J1-6
WT	DN2-38	13.1	TRBD1'01	1	2	GCCAGCAGTG					C	GGGACAG				A	TTTCCAACGAAAGATTATTT	J1-4
WT	DN2-39	13.1	TRBD1'01	1	2	GCCAGCAGTGATG	C			TC		GAC			T		CACAGAAGTCTTC	J1-1
WT	DN2-4	13.1	TRBD2'01	2	2	GCCAGCAGTGAT						CTGGGGGG			TCCT		CAAGACACCCAGTAC	J2-5
WT	DN2-40	13.1	TRBD2'01	2	2	GCCAGCAGT		G				GACTGGGG			AGCTCCTATGAG		CAGTAC	J2-5
WT	DN2-41	13.1	TRBD2'01	2	2	GCCAGCAGTGAT				CA		ACTGGGGGGGC	GC		TGG		AACCAAGACACCCAGTAC	J2-5
WT	DN2-42	13.1	TRBD1'01	1	1	GCCAGCAG				CGAT		ACAGGG			AGG	G	CAAACTCCGACTACACC	J1-2
WT	DN2-43	13.1	TRBD1'01	1	1	GCCAGCAGT				C		CAGGGG			AC		GCTGAGCAGTTC	J2-1
WT	DN2-44	13.1	TRBD2'01	2	3	GCCAGCAGTGAT				C		ACTGGG			T		CTATGAACAGTAC	J2-7
WT	DN2-45	13.1	TRBD2'01	2	1	GCCAGCAGT		G				GGACTGGGGG			C		GCAGAAACGCTGTAT	J2-3
WT	DN2-46	13.1	TRBD1'01	1	1	GCCAGCAGTGATG	C			GG		CAG			A		AAACACCGGGCAGCTCTAC	J2-2
WT	DN2-47	13.1	TRBD1'01	1	3	GCCAGCAGTGAT		G				ACAGGGG			AGAGG		GTGCAGAAACGCTGTAT	J2-3
WT	DN2-48	13.1	TRBD1'01	1	3	GCCAGCAGTGATG				GTC		GGGGGC	GC		AG		CTCCGACTACACC	J1-2
WT	DN2-49	13.1	TRBD1'01	1	2	GCCAGCAGTG				AA		GGACAG					AACACCTTGTAC	J2-4
WT	DN2-5	13.1	TRBD1'01	1	1	GCCAGCAGTG				GAT	CC	GGGACA			A		CAAACACAGAAGTCTTC	J1-1
WT	DN2-50	13.1	TRBD1'01	1	2	GCCAGCAGTG				GA		GGAC			GG		AACAACCAGGCTCCGCTT	J1-5
WT	DN2-51	13.1	TRBD1'01	1	1	GCCAGCAGTGA				A	CCC	GGGACA			AAC	G	CAAACTCCGACTACACC	J1-2
WT	DN2-52	13.1	TRBD1'01	1	3	GCCAGCAGTG				A		GGGGC			TA		AACGAAAGATTATTT	J1-4
WT	DN2-53	13.1	TRBD1'01	1	1	GCCAGCAGTG				ACCC		GGGC			A		AAAACACCTTGTAC	J2-4
WT	DN2-54	13.1	TRBD1'01	1	2	GCCAGCAG				CC		GACA			T	A	TTTCCAACGAAAGATTATTT	J1-4
WT	DN2-55	13.1	TRBD1'01	1	1	GCCAGCAGT		G				GGACA			ATT		AACACCGAGCAGCTCTAC	J2-2
WT	DN2-56	13.1	TRBD2'01	2	2	GCCAGCAGTG						GGGACT			TG		AGTCAAAACACCTTGTAC	J2-4
WT	DN2-57	13.1	TRBD1'01	1	2	GCCAGCA				CT		CAGGGG			AGGGG		AGACACCCAGTAC	J2-5
WT	DN2-58	13.1	TRBD1'01	1	1	GCCAGCAGT		G				GGACAGGGGGC	G				TTTCCAACGAAAGATTATTT	J1-4
WT	DN2-59	13.1	TRBD1'01	1	3	GCCAGCAGTG				AAGG		CAGGGG			AGG		AGAAACGCTGTAT	J2-3
WT	DN2-6	13.1	TRBD1'01	1	1	GCCAG				GC		CAGGGGG			GG		ATGCTGAGCAGTTC	J2-1
WT	DN2-7	13.1	TRBD1'01	1	3	GCCAGCAGTG				T	CC	GGGACA			AA		TATGAACAGTAC	J2-7
WT	DN2-8	13.1	TRBD1'01	1	1	GCCAGCAGTG				GTGCT		ACAGGGG			AT		AACTCCGACTACACC	J1-2
WT	DN2-9	13.1	TRBD2'01	2	1	GCCAGCA				GCATT		GGGACTGGGGG			T		TATGCTGAGCAGTTC	J2-1
